# Supplementary material for: Machine Learning to Identify Critical Biomarker Profiles in New SARS-CoV-2 Variants
Source: MDPI journal article supplement (doi:10.3390/microorganisms12040798), 2024-04-15
Supplement: s1 [file s1]

**Supplementary Table S1.** F1 scores of the Beta versus the Alpha variant, Alpha + E484K versus Omicron variant, and unvaccinated versus vaccinated

| Gene    | Comparison              | F1 score    |
|---------|-------------------------|-------------|
| EEF1DP3 | Beta-OMICRON            | 1           |
| EEF1E1  | Beta-ALPHAE484K         | 1           |
| EEF1E1  | Beta-ALPHA              | 1           |
| EIF1    | Beta-ALPHAE484K         | 1           |
| EIF1    | Beta-ALPHA              | 1           |
| EIF1    | Beta-OMICRON            | 1           |
| EIF2S3  | Beta-ALPHAE484K         | 1           |
| EIF2S3  | Beta-ALPHA              | 1           |
| EIF3I   | Beta-ALPHAE484K         | 1           |
| EIF3I   | Beta-ALPHA              | 1           |
| EIF3I   | Beta-OMICRON            | 1           |
| EIF4A2  | Beta-ALPHA              | 1           |
| EIF4G1  | Beta-OMICRON            | 1           |
| EIF4G2  | Beta-ALPHA              | 1           |
| EIF4G2  | Beta-OMICRON            | 1           |
| EIF4H   | Beta-OMICRON            | 1           |
| EIF5    | Beta-ALPHA              | 1           |
| EIF5    | Beta-OMICRON            | 1           |
| EIF5A   | Beta-ALPHA              | 1           |
| EIF5A   | Beta-OMICRON            | 1           |
| EIF4E   | Beta-OMICRON            | 0.923076923 |
| EIF1AY  | Beta-OMICRON            | 0.857142857 |
| EEF1E1  | Unvaccinated-Vaccinated | 0.769230769 |
| EIF1AX  | Beta-ALPHAE484K         | 0.909090909 |
| EIF1AX  | Beta-ALPHA              | 0.909090909 |
| EIF3K   | Beta-ALPHA              | 0.909090909 |
| EIF3M   | Beta-OMICRON            | 0.909090909 |
| EIF4H   | Beta-ALPHA              | 0.909090909 |
| EIF5    | Beta-ALPHAE484K         | 0.909090909 |
| EIF5A   | Beta-ALPHAE484K         | 0.909090909 |
| EEF1B2  | Beta-ALPHA              | 0.833333333 |
| EIF3M   | Beta-ALPHA              | 0.833333333 |
| MRRF    | Beta-ALPHAE484K         | 0.833333333 |
| EIF6    | Beta-ALPHA              | 0.769230769 |
| EIF4A2  | Unvaccinated-Vaccinated | 0.8         |
| EIF3E   | Unvaccinated-Vaccinated | 0.533333333 |
| EEF1DP3 | Beta-ALPHA              | 0.8         |
| EIF3K   | Beta-ALPHAE484K         | 0.8         |
| EIF3M   | Beta-ALPHAE484K         | 0.8         |
| EIF4A2  | Beta-ALPHAE484K         | 0.8         |
| EEF1B2  | Beta-ALPHAE484K         | 0.727272727 |
| EIF2S3  | Beta-OMICRON            | 0.727272727 |
| EIF3A   | Beta-OMICRON            | 0.727272727 |
| EIF3E   | Beta-ALPHAE484K         | 0.727272727 |
| EIF3E   | Beta-ALPHA              | 0.727272727 |
| EIF3L   | Beta-ALPHAE484K         | 0.727272727 |
| EIF3L   | Beta-ALPHA              | 0.727272727 |
| EIF4A2  | Beta-OMICRON            | 0.727272727 |

|         |                         |             |
|---------|-------------------------|-------------|
| EEF1A1  | Beta-ALPHAE484K         | 0.666666667 |
| EEF1A1  | Beta-ALPHA              | 0.666666667 |
| EIF1AX  | Beta-OMICRON            | 0.666666667 |
| EIF4B   | Beta-ALPHA              | 0.666666667 |
| EIF6    | Beta-OMICRON            | 0.666666667 |
| EIF3L   | Beta-OMICRON            | 0.615384615 |
| EIF4B   | Beta-OMICRON            | 0.615384615 |
| EIF2S3  | Unvaccinated-Vaccinated | 0.6         |
| EIF1AX  | Unvaccinated-Vaccinated | 0.545454545 |
| EIF1    | Unvaccinated-Vaccinated | 0.5         |
| EIF2S2  | Unvaccinated-Vaccinated | 0.461538462 |
| EIF4G2  | Unvaccinated-Vaccinated | 0.461538462 |
| EIF5A2  | Unvaccinated-Vaccinated | 0.461538462 |
| EEF1B2  | Unvaccinated-Vaccinated | 0.428571429 |
| EEF1D   | Unvaccinated-Vaccinated | 0.428571429 |
| EIF5    | Unvaccinated-Vaccinated | 0.428571429 |
| EIF5A   | Unvaccinated-Vaccinated | 0.428571429 |
| MRRF    | Unvaccinated-Vaccinated | 0.428571429 |
| EEF2    | Unvaccinated-Vaccinated | 0.4         |
| EIF3I   | Unvaccinated-Vaccinated | 0.4         |
| EIF3L   | Unvaccinated-Vaccinated | 0.4         |
| EEF1A1  | Unvaccinated-Vaccinated | 0.375       |
| EIF3G   | Unvaccinated-Vaccinated | 0.375       |
| EIF1AY  | Unvaccinated-Vaccinated | 0.352941176 |
| EEF1D   | Beta-ALPHA              | 0.6         |
| EEF1E1  | Beta-OMICRON            | 0.6         |
| EIF2B5  | Beta-ALPHAE484K         | 0.6         |
| EIF2B4  | Beta-ALPHAE484K         | 0.545454545 |
| EIF2S2  | Beta-ALPHAE484K         | 0.545454545 |
| EIF2S2  | Beta-OMICRON            | 0.545454545 |
| EIF3D   | Beta-ALPHAE484K         | 0.545454545 |
| EIF3D   | Beta-ALPHA              | 0.545454545 |
| EIF3H   | Beta-ALPHA              | 0.545454545 |
| EIF3K   | Beta-OMICRON            | 0.545454545 |
| EIF4B   | Beta-ALPHAE484K         | 0.545454545 |
| EIF2S2  | Beta-ALPHA              | 0.5         |
| EIF2B1  | Unvaccinated-Vaccinated | 0.333333333 |
| EIF2B4  | Unvaccinated-Vaccinated | 0.333333333 |
| EIF2S1  | Unvaccinated-Vaccinated | 0.333333333 |
| EIF5B   | Unvaccinated-Vaccinated | 0.333333333 |
| EIF2B3  | Unvaccinated-Vaccinated | 0.307692308 |
| EIF2B5  | Unvaccinated-Vaccinated | 0.307692308 |
| EIF3A   | Unvaccinated-Vaccinated | 0.307692308 |
| EIF3J   | Unvaccinated-Vaccinated | 0.307692308 |
| EIF4E   | Unvaccinated-Vaccinated | 0.307692308 |
| MTOR    | Unvaccinated-Vaccinated | 0.307692308 |
| EEF1G   | Unvaccinated-Vaccinated | 0.285714286 |
| EIF3M   | Unvaccinated-Vaccinated | 0.285714286 |
| EEF1DP3 | Unvaccinated-Vaccinated | 0.266666667 |
| EIF3B   | Unvaccinated-Vaccinated | 0.266666667 |
| EIF3C   | Unvaccinated-Vaccinated | 0.266666667 |
| EIF3H   | Unvaccinated-Vaccinated | 0.266666667 |

|        |                         |             |
|--------|-------------------------|-------------|
| EIF4B  | Unvaccinated-Vaccinated | 0.266666667 |
| EEF1A2 | Unvaccinated-Vaccinated | 0.25        |
| EIF2B2 | Unvaccinated-Vaccinated | 0.25        |
| EIF3K  | Unvaccinated-Vaccinated | 0.25        |
| EIF2A  | Beta-ALPHA              | 0.444444444 |
| EEF1D  | Beta-ALPHAE484K         | 0.4         |
| EEF1G  | Beta-ALPHAE484K         | 0.4         |
| EEF1G  | Beta-ALPHA              | 0.4         |
| EEF2   | Beta-ALPHA              | 0.4         |
| EIF2A  | Beta-ALPHAE484K         | 0.4         |
| EIF3A  | Beta-ALPHA              | 0.4         |
| EIF3C  | Beta-ALPHA              | 0.4         |
| EIF3H  | Beta-ALPHAE484K         | 0.4         |
| EIF4G1 | Beta-ALPHA              | 0.4         |
| EIF4G2 | Beta-ALPHAE484K         | 0.4         |
| EIF5A2 | Beta-ALPHA              | 0.4         |
| MRRF   | Beta-ALPHA              | 0.4         |
| EEF1A1 | Beta-OMICRON            | 0.363636364 |
| EEF2   | Beta-ALPHAE484K         | 0.363636364 |
| EIF2A  | Beta-OMICRON            | 0.363636364 |
| EIF3D  | Beta-OMICRON            | 0.363636364 |
| EIF3G  | Beta-ALPHA              | 0.363636364 |
| EIF3H  | Beta-OMICRON            | 0.363636364 |
| EIF4H  | Beta-ALPHAE484K         | 0.363636364 |
| EIF5A2 | Beta-ALPHAE484K         | 0.363636364 |
| EEF1D  | Beta-OMICRON            | 0.333333333 |
| EIF2A  | Unvaccinated-Vaccinated | 0.166666667 |
| EIF3D  | Unvaccinated-Vaccinated | 0.142857143 |
| EIF4G1 | Unvaccinated-Vaccinated | 0.142857143 |
| EIF4H  | Unvaccinated-Vaccinated | 0.133333333 |
| EIF2B4 | Beta-ALPHA              | 0.222222222 |
| EIF3B  | Beta-ALPHA              | 0.222222222 |
| EIF6   | Beta-ALPHAE484K         | 0.222222222 |
| EEF1A2 | Beta-ALPHAE484K         | 0.2         |
| EEF1A2 | Beta-ALPHA              | 0.2         |
| EEF1B2 | Beta-OMICRON            | 0.2         |
| EIF2S1 | Beta-ALPHAE484K         | 0.2         |
| EIF3A  | Beta-ALPHAE484K         | 0.2         |
| EIF3B  | Beta-ALPHAE484K         | 0.2         |
| EIF3C  | Beta-OMICRON            | 0.2         |
| EIF3E  | Beta-OMICRON            | 0.2         |
| EIF3G  | Beta-ALPHAE484K         | 0.2         |
| EIF4E  | Beta-ALPHAE484K         | 0.2         |
| EEF1G  | Beta-OMICRON            | 0.181818182 |
| EEF2   | Beta-OMICRON            | 0.181818182 |
| EIF3B  | Beta-OMICRON            | 0.181818182 |
| EIF3G  | Beta-OMICRON            | 0.181818182 |
| EIF5A2 | Beta-OMICRON            | 0.181818182 |
